# Supplementary material for: Sensitive and rapid detection of pathogenic bacteria from urine samples using multiplex recombinase polymerase amplification
Source: Royal Society of Chemistry journal article supplement (doi:10.1039/c8lc00399h), 2018-01-01
Supplement: c8lc00399h2.pdf [file c8lc00399h2.pdf]

# Sensitive and rapid detection of pathogenic bacteria from urine samples using multiplex recombinase polymerase amplification

Junge Chen,<sup>a,†</sup> Youchun Xu,<sup>a,b,†</sup> He Yan,<sup>a</sup> Yunzeng Zhu,<sup>a</sup> Lei Wang,<sup>b,c</sup> Yan Zhang,<sup>c</sup> Ying Lu<sup>a</sup> and Wanli Xing<sup>a,b,\*</sup>

## Supplementary materials

**Figure S1.** Pre-treatment of spiked urine samples. (A) The structure of the filter-based pipette for enrichment of bacteria. (B) First, the three-way switch was placed on a position to connect the tip and the white syringe. When we pressed and then released the white syringe, a volume of 5 mL urine was steadily sucked into the syringe through a 0.22  $\mu\text{m}$  filter by the bounce of the spring in white syringe, and the bacteria were thus captured and enriched on the membrane. (C) After that, we rotated the three-way switch for 90° to connect the tip with the blue syringe. (D) The bacterial suspension was injected into the chip with the pure water stored in the blue syringe.

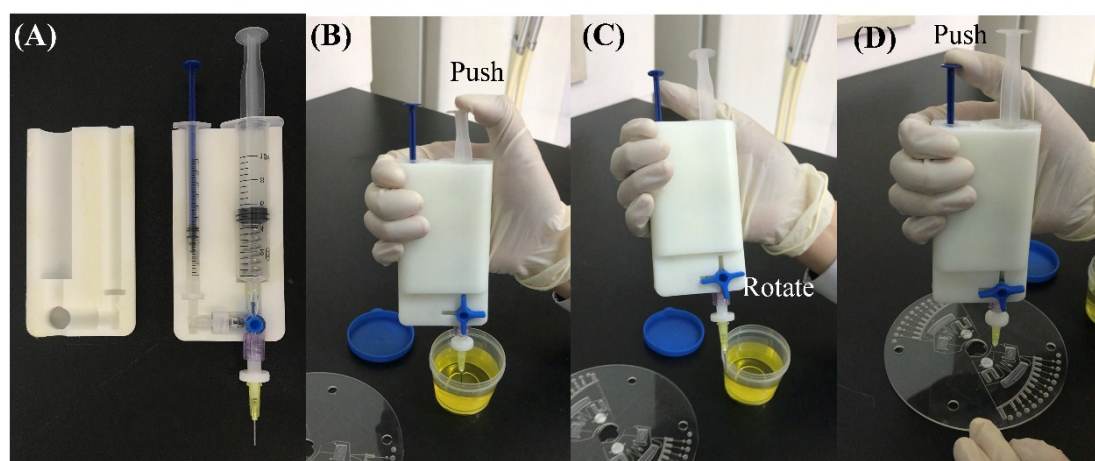

**Figure S2.** Off-chip RPA detection of five target bacteria (*E. coli*, *S. aureus*, *S. typhimurium*, *P. mirabilis*, and *P. aeruginosa*) in the urine samples. (RFU: relative fluorescence unit; NC: negative control).

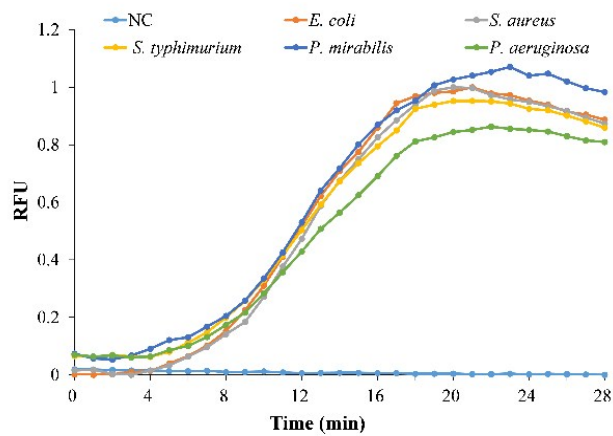

**Figure S3.** Specificity tests of RPA primers in the tube. (A) Specificity test for detecting *E. coli*. (B) Specificity test for detecting *S. aureus*. (C) Specificity test for detecting *S. typhimurium*. (D) Specificity test for detecting *P. mirabilis*. (E) Specificity test for detecting *P. aeruginosa*.

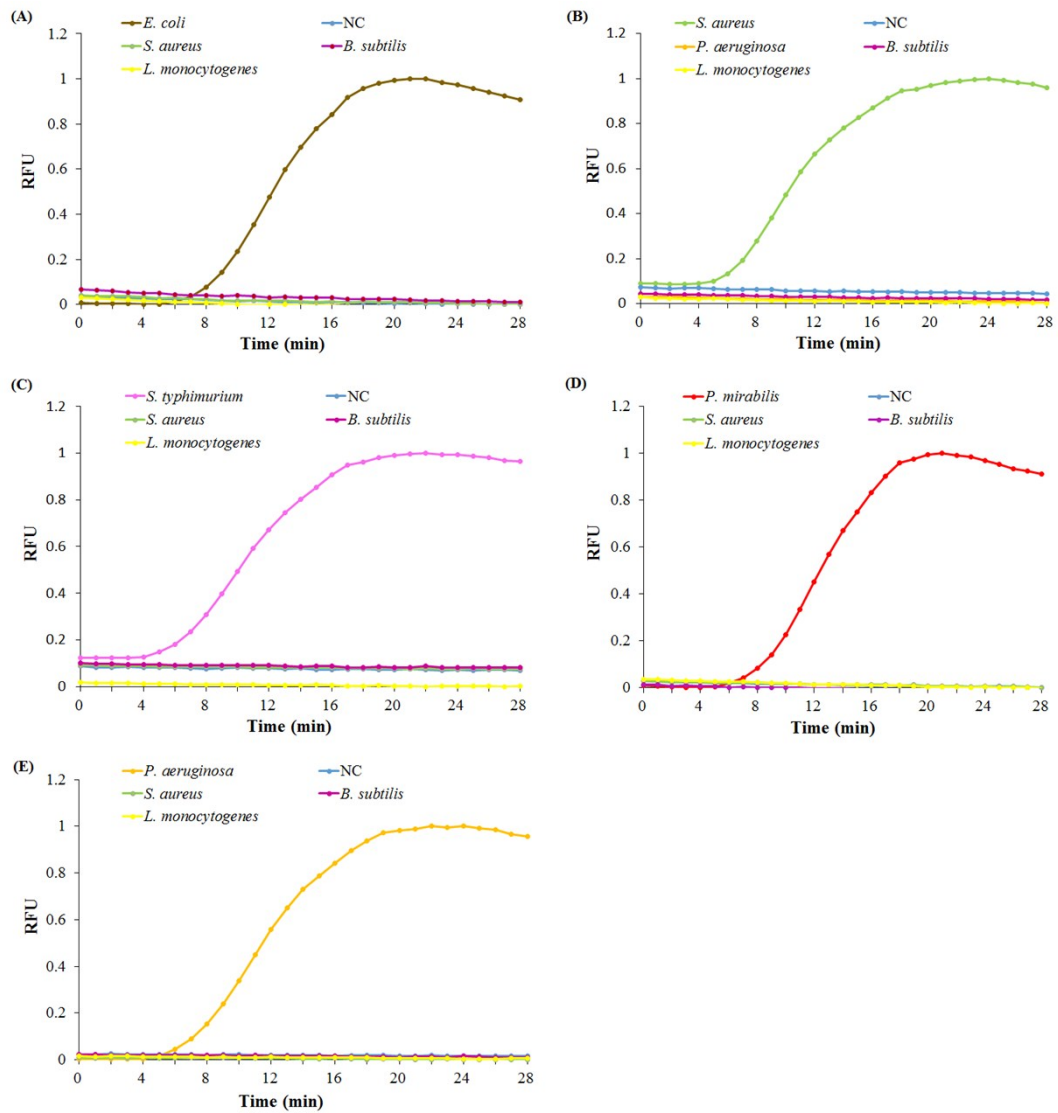

**Figure S4.** Optimization of bead-beating lysis. (A) Optimization of the rotate speed of magnets for Gram-positive bacteria (*S. aureus*); (B) Optimization of the lysis time for Gram-positive bacteria (*S. aureus*).

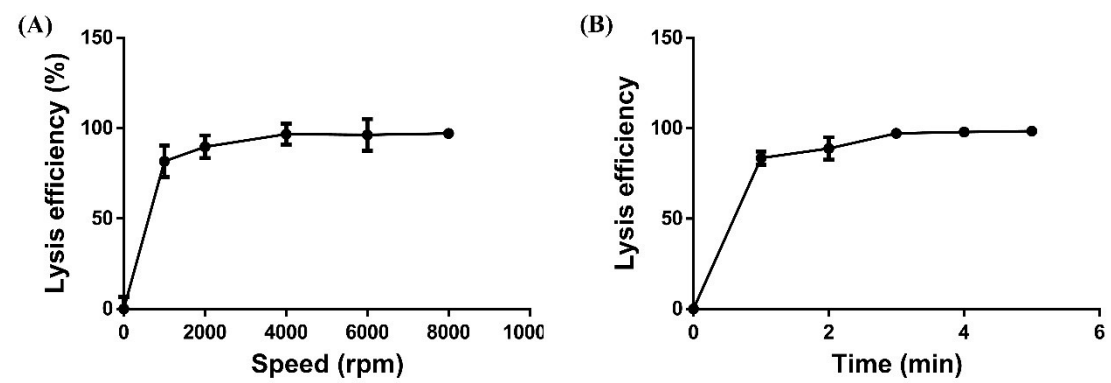

**Figure S5.** Specificity of on-chip real-time RPA.  $10^3$  CFU/mL of *E. coli* and *B. subtilis* were spiked in the urine.

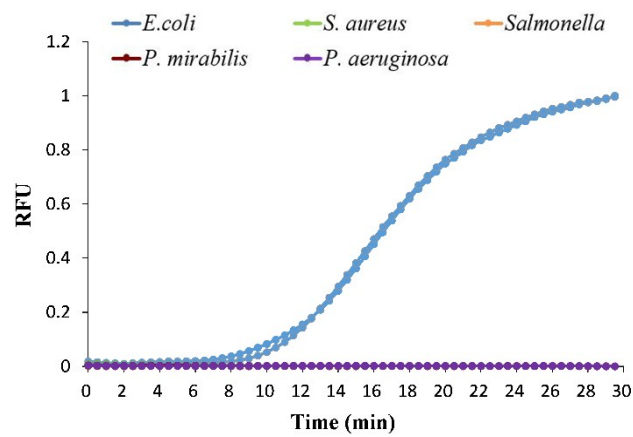

**Table S1.** Sequences of RPA primers for the various pathogens.

| Pathogen              | Target gene | Nucleotide sequence 5' to 3'                                                                                                                                                                          |
|-----------------------|-------------|-------------------------------------------------------------------------------------------------------------------------------------------------------------------------------------------------------|
| <i>E. coli</i>        | endA        | Primer F: GTACGTTTTATTGCGGATGTAAAATTAAGTG<br>Primer R: ATAGACCGGATCTTTAGCGCAGTTTTTAC<br>Probe: GGGCAAAAAAGGCGTTGTTGATCTGCAA-T(FAM)-<br>THF-T(BHQ-1)-GCGGCTATCAGGTGCGC-<br>GGATGAAATTAACGAAG-C6 Spacer |
| <i>S. aureus</i>      | MecA        | Primer F: CGATATCGAGGCCCGTGGATTTAGTCGTGA<br>Primer R: GTGACTTCGACACCTTTTTCAAAGGCATGTAC<br>Probe: CGCAAACGTGGCGAAGAATTCTTTTGGTCAA-T(FAM)-<br>THF-A-T(BHQ-1)-GGATGAAATTAACGAAG-C6 Spacer                |
| <i>S. typhimurium</i> | STM4599     | Primer F: GTCGAAATCTAGCTAATCTACTGGTTCCTCC<br>Primer R: CTGTGCTGTATTAAGATCATGAAACGCAGTAT<br>Probe: CTGGTGTTTCAGCCAAAACATCAGCAGGCCA-<br>T(FAM)-C-THF-A-T(BHQ-1)-GGCGGCATACAGGC-C6 Spacer                |
| <i>P. mirabilis</i>   | ureR        | Primer F: GTATATGGTGCAAAAGGTGAGATTTGTATTA<br>Primer R: TTGTAATTCAGTTTCAGACAGTACTAAGGTAT<br>Probe: GATTATTCCTAAATATAGTCAAGTTTCTTG-T(FAM)-<br>THF-A-T(BHQ-1)-GTGACAAATTTTTTC-C6 Spacer                  |
| <i>P. aeruginosa</i>  | ETA         | Primer F: GTGCTGCACTACTCCATGGTCCTGGAGGG<br>Primer R: GTTCGTGGATGAACACCTTGATGTTCGAGG<br>Probe: GAAGGTGGCGTCGAGCCGAACAAGCCGG-T(FAM)-G-<br>THF-GC-T(BHQ-1)-ACAGCTACACGC-C6 Spacer                        |

**Table S2.** Pre-storage of RPA master mix in real-time RPA chambers.

| Reagents                                   | Volume       |
|--------------------------------------------|--------------|
| 10 $\mu$ M species-specific forward primer | 0.42 $\mu$ L |
| 10 $\mu$ M species-specific reverse primer | 0.42 $\mu$ L |
| 10 $\mu$ M species-specific probe          | 0.12 $\mu$ L |
| 280 mM magnesium acetate                   | 0.50 $\mu$ L |
| 50 mg/mL BSA                               | 0.10 $\mu$ L |

**Table S3.** Spinning program of the complete assay.

| No. | Speed (rpm) | Time (s) | Operation                                                      |
|-----|-------------|----------|----------------------------------------------------------------|
| A   | 0           | 180      | Cell lysis                                                     |
| B   | 100         | 10       | Siphon                                                         |
| C   | 3000        | 10       | Transfer the bacterial lysate into the quantitative chamber    |
|     | 50          | 10       | Siphon                                                         |
| D   | 2000        | 30       | Transfer the lysate and RPA master mix into the mixing chamber |
|     | 500 ↔ 4000  | 60       | Mixing of bacterial lysate and RPA master mix                  |
|     | 50          | 10       | Siphon                                                         |
| E   | 1000        | 30       | Pre-distribution of the mixture                                |
| F   | 4000        | 10       | Dispensing of the sample into ten reaction chambers            |
